# Supplementary material for: In Utero Transfer of Adeno-Associated Viral Vectors Produces Long-Term Factor IX Levels in a Cynomolgus Macaque Model
Source: PubMed Central journal article supplement (PMC5542637; doi:10.1016/j.ymthe.2017.04.003), 2017-04-24
Supplement: mmc1.pdf [file mmc1.pdf]

**Supplemental Information**

**In Utero Transfer of Adeno-Associated Viral  
Vectors Produces Long-Term Factor IX Levels  
in a Cynomolgus Macaque Model**

**Citra N.Z. Mattar, Irene Gil-Farina, Cecilia Rosales, Nuryanti Johana, Yvonne Yi Wan Tan, Jenny McIntosh, Christine Kaepfel, Simon N. Waddington, Arijit Biswas, Mahesh Choolani, Manfred Schmidt, Amit C. Nathwani, and Jerry K.Y. Chan**

**Table S1. AAV peptide sequences for T cell intracellular stimulation studies (SUPPLEMENTARY)**

**AAV8 peptide sequences for ICS**

H-AGGGAPMADNNEGAD-OH  
H-PMADNNEGADGVGSS-OH  
H-NEGADGVGSSSGNWH-OH  
H-GVGSSSGNWHCDSTW-OH  
H-SGNWHCDSTWLGDRV-OH  
H-CDSTWLGDRVITTST-OH  
H-PQYGYLTLNNGSQAV-OH  
H-LTLNNGSQAVGRSSF-OH  
H-GSQAVGRSSFYCLEY-OH  
H-GRSSFYCLEYFPSQM-OH  
H-YCLEYFPSQMLRTGN-OH  
H-FPSQMLRTGNFQFT-OH  
H-RNSLANPGIAMATHK-OH  
H-NPGIAMATHKDDEER-OH  
H-MATHKDDEERFFPSN-OH  
H-DDEERFFPSNGILIF-OH  
H-FFPSNGILIFGKQNA-OH  
H-GILIFGKQNAARDNA-OH  
H-MLTSEEEIKTTNPVA-OH  
H-EEIKTTNPVATEEYG-OH  
H-TNPVATEEYGIVADN-OH  
H-TEEYGIVADNLQQQN-OH  
H-IVADNLQQQNTAPQI-OH  
H-LQQQNTAPQIGTVNS-OH

**AAV5 peptide sequences for ICS**

H-QGADGVGNASGDWHC-OH  
H-VGNASGDWHCDSTWM-OH  
H-GDWHCDSTWMGDRVV-OH  
H-DSTWMGDRVVTKSTR-OH  
H-GDRVVTKSTRTWVLP-OH  
H-TKSTRTWVLPYNNH-OH  
H-NFEFTYNFEEVPFHS-OH  
H-YNFEEVPFHSSFAPS-OH  
H-VPFHSSFAPSQNLFK-OH  
H-SFAPSQNLFKLANPL-OH  
H-QNLFKLANPLVDQYL-OH  
H-LANPLVDQYLYRFVS-OH  
H-PQPNGMTNNLQGSNT-OH  
H-MTNNLQGSNTYALEN-OH  
H-QGSNTYALENTMIFN-OH  
H-YALENTMIFNSQPAN-OH  
H-TMIFNSQPANPGTTA-OH  
H-SQPANPGTTATYLEG-OH  
H-QYSTGQVTVEMEWEL-OH  
H-QVTVEMEWELKKENS-OH  
H-MEWELKKENSKRWNP-OH  
H-KKENSKRWNPFIQYT-OH  
H-KRWNPFIQYTNND-OH  
H-EIQYTNNDPQFVD-OH

**Table S2: Primers for quantitative and LAM-PCR (SUPPLEMENTARY)**

| <b>Primer</b>       | <b>Sequence (5'-3')</b>                                                                    |
|---------------------|--------------------------------------------------------------------------------------------|
| Pf scAAV-LP1-hFIXco | GGAGAGGAGCAGAGGTTGTC                                                                       |
| Pr scAAV-LP1-hFIXco | TGGTGGTGCCTGAAGCTGAG                                                                       |
| Pf $\beta$ -actin   | TCCTGTGGCATCCACGAAA                                                                        |
| Pf $\beta$ -actin   | CCACGTCACACTTCATGATGG                                                                      |
| Linear PCR          | GTCGAGTGGATGTTGGAGGTG                                                                      |
| Expo 1 vector       | AGCTCCAAGGTCAGCAGGCA                                                                       |
| Expo 1 LCI          | GACCCGGGAGATCTGAATTC                                                                       |
| Expo 2              | GTGTTTGCTGTTTGCTGCTTGC                                                                     |
| Expo 2 LCII         | GATCTGAATTCAGTGGCACAG                                                                      |
| Library prep vector | AATGATACGGCGACCACCGAGATCTACACTCTTTCCCTA<br>CACGACGCTCTTCCGATCT(BC)GCCCATTTTAGGGGTCA<br>CGA |
| Library prep LCIII  | CAAGCAGAAGACGGCATAACGAGATCGGTCTCGGCATTC<br>CTGCTGAACCGCTCTTCCGATCTAGTGGCACAGCAGTTA<br>GG   |
